# Supplementary material for: Modulation of hepatitis B virus infection by epidermal growth factor secreted from liver sinusoidal endothelial cells
Source: PubMed Central journal article supplement (PMC7462976; doi:10.1038/s41598-020-71453-5), 2020-09-01
Supplement: 41598_2020_71453_MOESM1_ESM.pdf [file 41598_2020_71453_MOESM1_ESM.pdf]

**Modulation of Hepatitis B virus infection by epidermal growth factor secreted from  
liver sinusoidal endothelial cells**

Shin-Wei Chen<sup>1</sup>, Misao Himeno<sup>1</sup>, Yuta Kou<sup>1</sup>, Masaya Sugiyama<sup>2</sup>, Hironori Nishitsuji<sup>2</sup>,  
Masashi Mizokami<sup>2</sup>, Kunitada Shimotohno<sup>2</sup>, Atsushi Miyajima<sup>1</sup> and Taketomo Kido<sup>1\*</sup>

<sup>1</sup>Institute for Quantitative Biosciences, The University of Tokyo

1-1-1 Yayoi, Bunkyo-ku, Tokyo 113-0032, Japan

<sup>2</sup>Genome Medical Science Project, National Center for Global Health and Medicine

1-7-1 Kohnodai, Ichikawa, 272-8516, Japan

**Supplementary Table 1. List of quantitative PCR primers for mouse genes**

| gene          | Left Primer           | Right Primer          |
|---------------|-----------------------|-----------------------|
| <i>Stab2</i>  | TGTCCAGACGGCTACATCAA  | CCAGGGATATCCAGGACGTA  |
| <i>Lyve1</i>  | CCTCCAGCCAAAAGTTCAAA  | TCCAACACGGGGTAAAATGT  |
| <i>Pecam1</i> | CTGGTGCTCTATGCAAGCCT  | AGTTGCTGCCCATTTCATCAC |
| <i>F8</i>     | TCATGTATAGCCTGGATGGGA | GATGAGTCCACATTGCCAAA  |
| <i>Ngfr</i>   | GTGTGCGAGGACACTGAGC   | GGGGGTAGACCTTGTGATCC  |
| <i>Desmin</i> | GTGAAGATGGCCTTGGATGT  | CTCGGAAGTTGAGAGCAGAGA |
| <i>Hgf</i>    | CCTGACACCACTTGGGAGTA  | CTTCTCCTTGGCCTTGAATG  |
| <i>Actb</i>   | TTCTTTGCAGCTCCTTCGTT  | ATGGAGGGGAATACAGCCC   |

**Supplementary Table 2. List of quantitative PCR primers and probes for HBV**

**detection**

|           | Primer/Probe          |
|-----------|-----------------------|
| HBSF2     | CTTCATCCTGCTGCTATGCCT |
| HBSR2     | AAAGCCCAGGATGATGGGAT  |
| cccDNA F7 | TCCCCGTCTGTGCCTTCTC   |
| cccDNA R7 | GCACAGCTTGGAGGCTTGA   |
| cccDNA P7 | FAM- CCGTGTGCACTTCG   |

**Supplementary Table 3. List of primary and secondary antibodies used for immunocytochemistry analysis and FCM analysis of mouse and human cells**

| Primary Antibody | Supplier                 |
|------------------|--------------------------|
| LAMP2            | abcam (ab25631)          |
| EGFR             | cell signaling (D38B1)   |
| Myc              | abcam (ab206486)         |
| Stabilin2        | Nonaka et al.            |
| LNGFR            | Miltenyi biotec (REA648) |

| Secondary Antibody              | Supplier            |
|---------------------------------|---------------------|
| Alexa Fluor 488 anti-Rabbit IgG | Invitrogen (A32790) |
| Alexa Fluor 555 anti-Mouse IgG  | Invitrogen (A21424) |

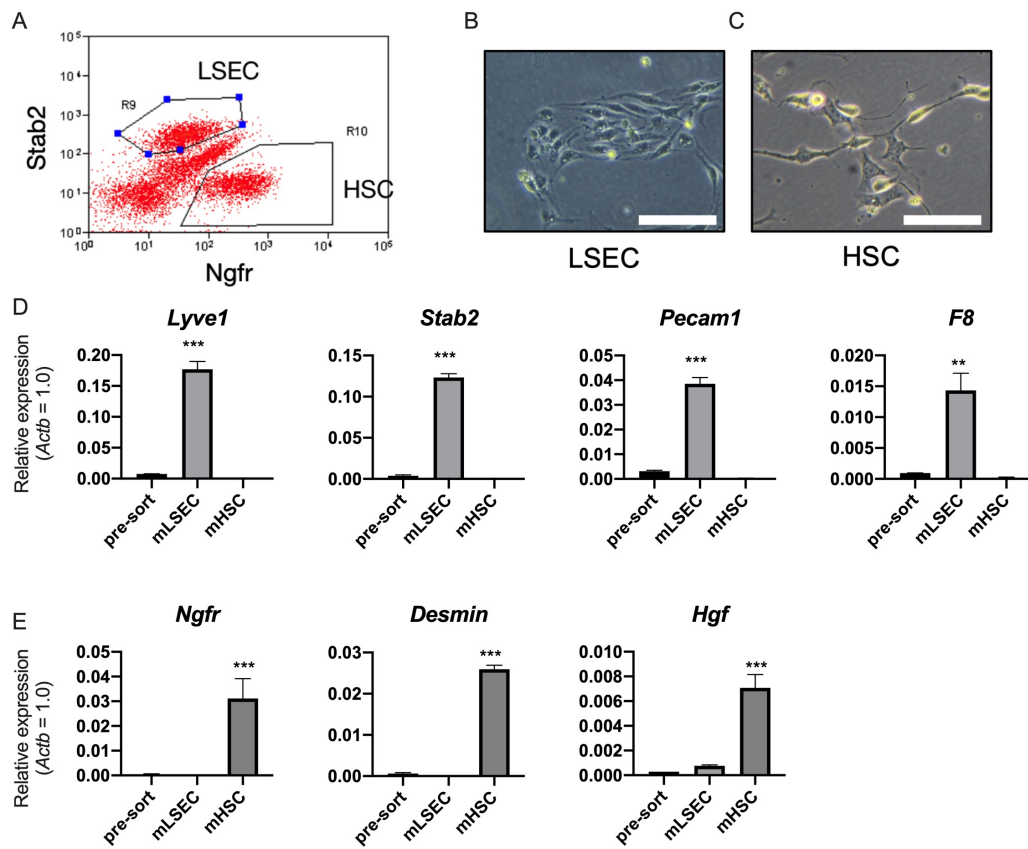

**Supplementary Fig. 1. Identification and characterization of fetal mouse LSECs and**

**HSCs.**

(A) Flow cytometric analysis of fetal mouse liver cells at E14.5.

(B) Primary culture of  $Stab2^+$  cells. Scale bar, 100  $\mu$ m.

(C) Primary culture of  $Ngfr^+$  cells. Scale bar, 100  $\mu$ m.

(D) Expression levels of LSEC markers in pre-sorting cells (pre-sort),  $Stab2^+$  cells

(LSECs), and  $Ngfr^+$  cells (HSCs). The results are shown as the mean  $\pm$  SEM of 3

independent experiments. n = 3 in each group. The significant difference was determined

in each group compared with the control group. \*\*\* $p < 0.001$ .

(E) Expression levels of HSC markers in pre-sorting cells (pre-sort),  $Stab2^+$  cells (LSECs)

and  $Ngfr^+$  (HSCs) cells. The results are shown as the mean  $\pm$  SEM of 3 independent

experiments. The significant difference was determined in each group compared with the

control group. \*\*\* $p < 0.001$ .

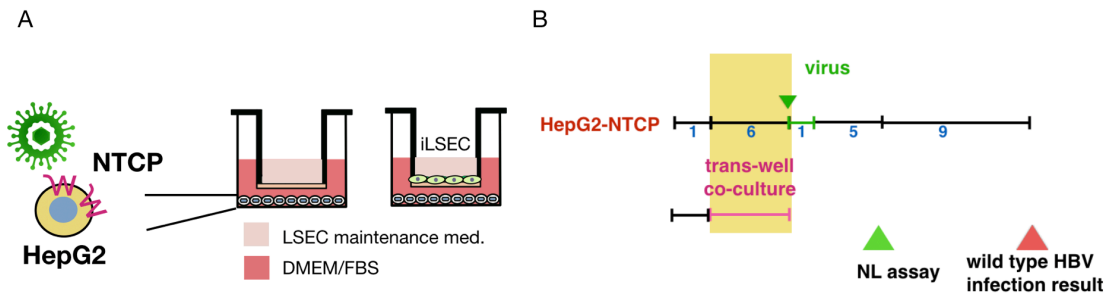

**Supplementary Fig. 2.**

**HBV infection to HepG2-NTCP cells co-cultured with iPSC-derived LSECs in the trans-well system.**

(A) Experimental design of the trans-well co-culture system of HepG2-NTCP cells with iPSC-derived LSECs.

(B) Experimental design of HBV infection using HBV/NL and wild type HBV in the trans-well co-culture system

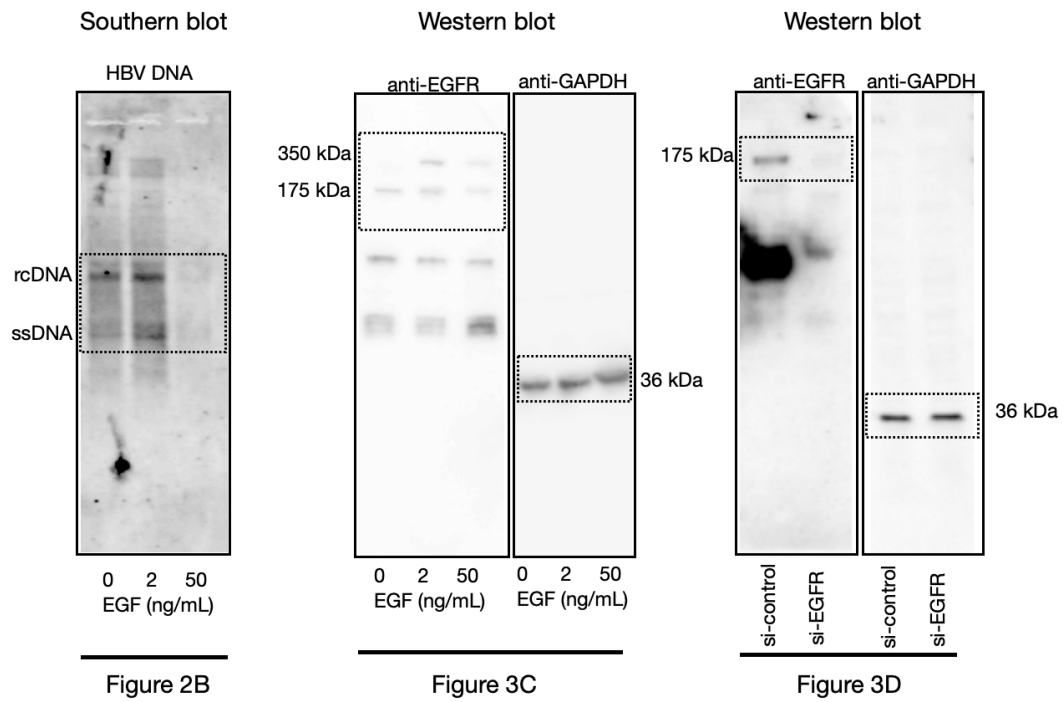

**Supplementary Fig. 3.**

**The images of full-length blots in figures**

(Left) Southern blot analysis in Figure 2B, (Middle) Western blot analysis in Figure 3C,

(Right) Western blot analysis in Figure 3D.
